# Supplementary material for: A highly conducting tetrathiafulvalene-tetracarboxylate based dysprosium(iii) 2D metal–organic framework with single molecule magnet behaviour
Source: Royal Society of Chemistry journal article supplement (doi:10.1039/d4sc05763e), 2024-01-01
Supplement: d4sc05763e1.pdf [file d4sc05763e1.pdf]

## Supporting Informations

# A Highly Conducting Tetrathiafulvalene-Tetracarboxylate Based Dysprosium(III) 2D Metal-Organic Framework with Single Molecule Magnet Behavior

Fabio Manna,<sup>abc</sup> Mariangela Oggianu,<sup>ac</sup> Pascale Auban-Senzier,<sup>d</sup> Ghenadie Novitchi,<sup>e</sup> Enric Canadell,<sup>f</sup> Maria Laura Mercuri\*<sup>ac</sup> and Narcis Avarvari\*<sup>b</sup>

<sup>a</sup> Dipartimento di Scienze Chimiche e Geologiche, Università degli Studi di Cagliari, I-09042 Monserrato, Italy. E-mail: [mercuri@unica.it](mailto:mercuri@unica.it)

<sup>b</sup> Univ Angers, CNRS, MOLTECH-ANJOU, SFR MATRIX, F-49000 Angers, France. E-mail: [narcis.avarvari@univ-angers.fr](mailto:narcis.avarvari@univ-angers.fr)

<sup>c</sup> INSTM, Via Giuseppe Giusti, 9, 50121 Firenze, Italy

<sup>d</sup> Université Paris-Saclay, CNRS, UMR 8502, Laboratoire de Physique des Solides, 91405 Orsay, France

<sup>e</sup> Laboratoire National des Champs Magnétiques Intenses, UPR CNRS 3228, Université Grenoble-Alpes, B.P. 166, 38042 Grenoble Cedex 9, France

<sup>f</sup> Institut de Ciència de Materials de Barcelona, ICMAB-CSIC, Campus de la UAB, 08193 Bellaterra, Spain, and Royal Academy of Sciences and Arts of Barcelona, Chemistry Section, La Rambla 115, 08002 Barcelona, Spain

## Contents

|                                |   |
|--------------------------------|---|
| Crystal Structure .....        | 2 |
| Table S1.....                  | 2 |
| Table S2.....                  | 3 |
| Figure S1 .....                | 4 |
| Table S3.....                  | 4 |
| Pore and Thermal Analysis..... | 5 |
| Figure S2 .....                | 5 |
| Table S4.....                  | 6 |
| Table S5.....                  | 6 |
| Figure S3 .....                | 7 |

|                                                        |    |
|--------------------------------------------------------|----|
| <b>Photophysical characterization</b> .....            | 7  |
| <b>Figure S4</b> .....                                 | 7  |
| <b>Electron transport properties of TTF-MOFs</b> ..... | 8  |
| <b>Table S6</b> .....                                  | 8  |
| <b>Magnetic Properties</b> .....                       | 10 |
| <b>Figure S5</b> .....                                 | 10 |
| <b>Figure S6</b> .....                                 | 11 |
| <b>Figure S7</b> .....                                 | 12 |
| <b>Figure S8</b> .....                                 | 13 |
| <b>Figure S9</b> .....                                 | 14 |
| <b>Figure S10</b> .....                                | 15 |
| <b>Figure S11</b> .....                                | 16 |
| <b>Figure S12</b> .....                                | 17 |
| <b>Figure S13</b> .....                                | 18 |
| <b>Figure S14</b> .....                                | 19 |
| <b>References</b> .....                                | 19 |

## Crystal Structure

| Table S1. Selected distances (Å) and angles (deg) |           |                     |          |
|---------------------------------------------------|-----------|---------------------|----------|
| Dy-O <sub>COO</sub> -                             |           | Dy-O <sub>H2O</sub> |          |
| Dy1-O3                                            | 2.323(4)  | Dy1-O21             | 2.367(5) |
| Dy1-O9                                            | 2.283(5)  | Dy1-O23             | 2.392(3) |
| Dy1-O2                                            | 2.526(5)  | Dy1-O22             | 2.461(5) |
| Dy1-O1'                                           | 2.493(4)  |                     |          |
| Dy1-O1                                            | 2.442(3)  |                     |          |
| Dy1-O11                                           | 2.415(5)  |                     |          |
|                                                   |           |                     |          |
| Dy2-O15                                           | 2.365(3)  | Dy2-O26             | 2.387(4) |
| Dy2-O13                                           | 2.322(4)  | Dy2-O27             | 2.361(5) |
| Dy2-O5                                            | 2.287(5)  | Dy2-O25             | 2.405(5) |
| Dy2-O7                                            | 2.286(5)  | Dy2-O24             | 2.376(5) |
|                                                   |           |                     |          |
| Dy3-O14                                           | 2.354(5)  | Dy3-O30             | 2.402(5) |
| Dy3-O19                                           | 2.303(4)  | Dy3-O29             | 2.470(3) |
| Dy3-O17                                           | 2.290(5)  | Dy3-O31             | 2.394(4) |
| Dy3-O4                                            | 2.306(4)  | Dy3-O28             | 2.447(4) |
| Selected angle                                    |           |                     |          |
| Dy2-Dy3-Dy1                                       | 161.24(1) |                     |          |
| Dy3-Dy1-Dy1'                                      | 115.09(1) |                     |          |
| Dy1-O1-Dy1'                                       | 112.4(1)  |                     |          |

|                                             |                |              |
|---------------------------------------------|----------------|--------------|
| Symmetry code: (') 1-x,1-y,1-z              |                |              |
| Shape parameters calculated (SHAPE 2.1)     |                |              |
| Dy1                                         |                |              |
| <b>Muffin (Cs)</b>                          | <b>MFF-9</b>   | <b>7.547</b> |
| Spherical capped square antiprism (C4v)     | CSAPR-9        | 7.875        |
| Spherical tricapped trigonal prism (D3h)    | TCTPR-9        | 7.965        |
| Dy2                                         |                |              |
| <b>Biaugmented trigonal prism J50 (C2v)</b> | <b>JBTPR-8</b> | <b>5.600</b> |
| Snub diphenoid J84 (D2d)                    | JSD-8          | 6.535        |
| Biaugmented trigonal prism (C2v)            | BTPR-8         | 6.538        |
| Dy3                                         |                |              |
| <b>Snub diphenoid J84 (D2d)</b>             | <b>JSD-8</b>   | <b>5.466</b> |
| Biaugmented trigonal prism J50 (C2v)        | JBTPR-8        | 6.407        |
| BTPR-8                                      | BTPR-8         | 7.814        |

|                                                                                                      |           |
|------------------------------------------------------------------------------------------------------|-----------|
| <b>Table S2.</b> Contact distances < 7 Å for Dy <sup>III</sup>                                       |           |
| interclusters                                                                                        |           |
| Dy2...Dy3                                                                                            | 5.6926(6) |
| Dy3...Dy1                                                                                            | 5.1990(5) |
| Dy1...Dy1 <sup>(i)</sup>                                                                             | 4.1003(5) |
| intralayers                                                                                          |           |
| Dy1...Dy3 <sup>(ii)</sup>                                                                            | 6.4200(7) |
| interlayers                                                                                          |           |
| Dy2...Dy3 <sup>(iii)</sup>                                                                           | 6.1672(7) |
| Dy2...Dy1 <sup>(iv)</sup>                                                                            | 6.4840(6) |
| Dy2...Dy2 <sup>(v)</sup>                                                                             | 6.1437(6) |
| Symmetry codes:<br>(I) 1-x,1-y,1-z; (II) 2-x,1-y,1-z, (III); x,y,1+z; (IV) x,-1+y,z; (V) 2-x,-y,2-z. |           |

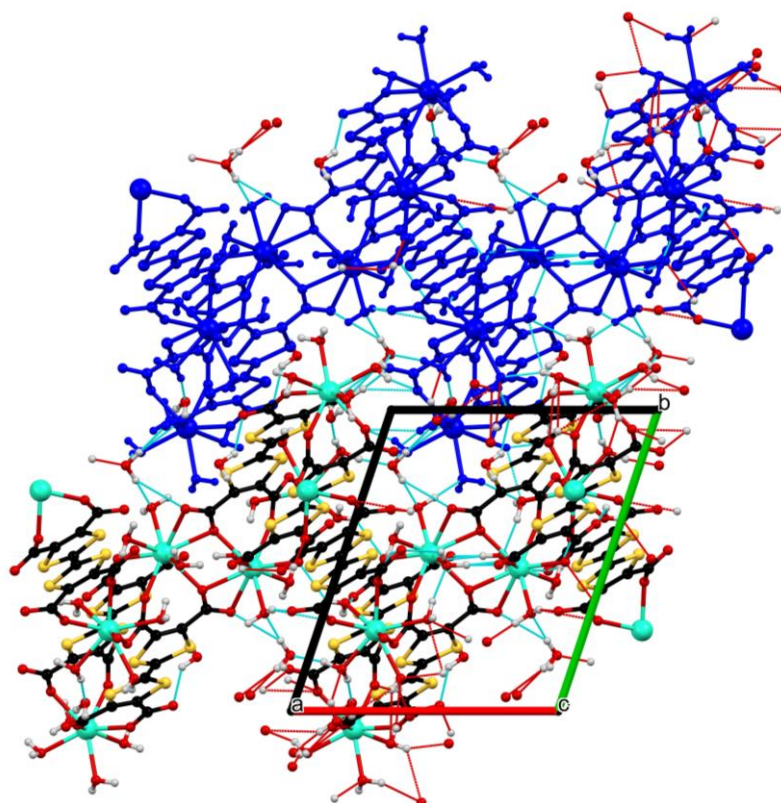

**Figure S1.** H-bond interaction within two different layers.

| <b>Table S3.</b> Calculated parameters with Pore Analyser in Mercury |               |                                 |
|----------------------------------------------------------------------|---------------|---------------------------------|
| <b>Parameter</b>                                                     | <b>Result</b> | <b>Unit</b>                     |
| System Volume                                                        | 2670.61       | Å <sup>3</sup>                  |
| System Mass                                                          | 3253.15       | g/mol                           |
| System Density                                                       | 2.023         | g/cm <sup>3</sup>               |
| Total surface area                                                   | 109.47        | Å <sup>2</sup>                  |
| Total surface area per volume                                        | 409.9         | m <sup>2</sup> /cm <sup>3</sup> |
| Total surface area per mass                                          | 202.65        | m <sup>2</sup> /g               |
| Network-accessible surface area                                      | 109.47        | Å <sup>2</sup>                  |
| Network-accessible surface area per volume                           | 409.9         | m <sup>2</sup> /cm <sup>3</sup> |
| Network-accessible surface area per mass                             | 202.65        | m <sup>2</sup> /g               |
| Total helium volume                                                  | 712.72        | Å <sup>3</sup>                  |
| Total helium volume                                                  | 0.132         | cm <sup>3</sup> /g              |
| Total geometric volume                                               | 991.388       | Å <sup>3</sup>                  |
| Total geometric volume                                               | 0.184         | cm <sup>3</sup> /g              |
| Network-accessible helium volume                                     | 712.075       | Å <sup>3</sup>                  |
| Network-accessible helium volume                                     | 0.132         | cm <sup>3</sup> /g              |
| Network-accessible geometric volume                                  | 989.354       | Å <sup>3</sup>                  |
| Network-accessible geometric volume                                  | 0.183         | cm <sup>3</sup> /g              |
| Pore limiting diameter                                               | 4.16          | Å                               |
| Maximum pore diameter                                                | 5.54          | Å                               |

## Pore and Thermal Analysis

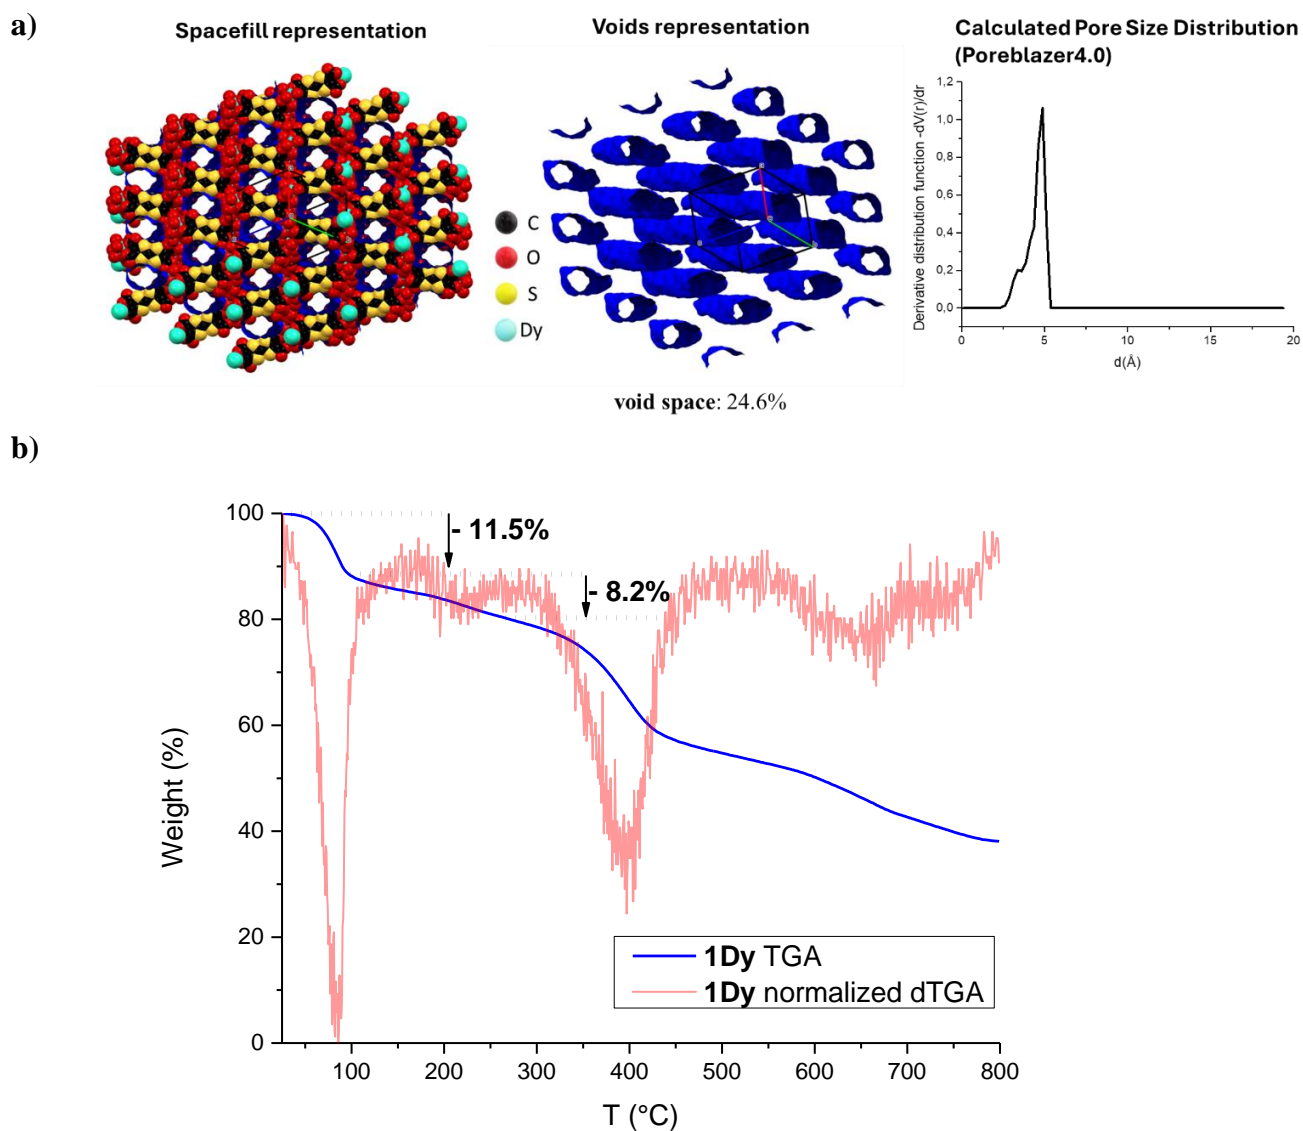

**Figure S2.** a) Sphere packing representation of the structure and the voids (in blue), left, and 1D voids representation, right. Pore size distribution calculated with Poreblazer4.0. b) Thermogram (blue) and dTGA normalized from 0 to 100 (red) for **1Dy** with weight loss highlighted.

| <b>Table S4.</b> TTF bond distances* (Å) for reference compounds                                                                |       |       |       |       |          |        |      |
|---------------------------------------------------------------------------------------------------------------------------------|-------|-------|-------|-------|----------|--------|------|
|                                                                                                                                 | a     | b     | c     | d     | $\delta$ | $\rho$ | Ref. |
| MIL-132K                                                                                                                        | 1.340 | 1.768 | 1.747 | 1.360 | 0.815    | 0      | [1]  |
| MIL-133K                                                                                                                        | 1.353 | 1.756 | 1.751 | 1.353 | 0.801    | 0      | [1]  |
| MIL-135K                                                                                                                        | 1.401 | 1.720 | 1.729 | 1.359 | 0.689    | 1      | [1]  |
| Co(H <sub>2</sub> O) <sub>6</sub> (TTFTC)H <sub>2</sub> ·2H <sub>2</sub> O                                                      | 1.335 | 1.752 | 1.745 | 1.356 | 0.806    | 0      | [2]  |
| [Zn(bipy) <sub>2</sub> (H <sub>2</sub> O) <sub>4</sub> ][Zn(TTFTC)(H <sub>2</sub> O) <sub>2</sub> ]                             | 1.327 | 1.759 | 1.750 | 1.356 | 0.845    | 0      | [2]  |
| [Fe(bipy) <sub>2</sub> (H <sub>2</sub> O) <sub>4</sub> ][Fe(TTFTC)(H <sub>2</sub> O) <sub>2</sub> ]                             | 1.328 | 1.761 | 1.747 | 1.336 | 0.836    | 0      | [2]  |
| [Co <sub>2</sub> ( $\mu_2$ -OH <sub>2</sub> ) <sub>2</sub> (H <sub>2</sub> O) <sub>8</sub> ](H <sub>2</sub> TTFTC) <sub>2</sub> | 1.344 | 1.744 | 1.746 | 1.345 | 0.812    | 0      | [3]  |
| {(MV)(L)[Na <sub>2</sub> (H <sub>2</sub> O) <sub>8</sub> ]·4H <sub>2</sub> O} <sub>n</sub>                                      | 1.338 | 1.759 | 1.754 | 1.334 | 0.854    | 0      | [4]  |
| {(MV)[Mn(L)(H <sub>2</sub> O) <sub>2</sub> ]·2H <sub>2</sub> O} <sub>n</sub>                                                    | 1.312 | 1.765 | 1.775 | 1.321 | 0.895    | 0      | [4]  |
| 1-{(MV)[Mn(L)(H <sub>2</sub> O) <sub>2</sub> ]} <sub>n</sub>                                                                    | 1.342 | 1.759 | 1.765 | 1.332 | 0.851    | 0      | [4]  |
| 2-{(MV)[Mn(L)(H <sub>2</sub> O) <sub>2</sub> ]} <sub>n</sub>                                                                    | 1.342 | 1.770 | 1.778 | 1.331 | 0.875    | 0      | [4]  |
| ([Na <sub>4</sub> (TTFTC)(H <sub>2</sub> O) <sub>2</sub> ]·0.5H <sub>2</sub> O) <sup>47</sup>                                   | 1.342 | 1.759 | 1.747 | 1.335 | 0.829    | 0      | [5]  |
| [Rb <sub>4</sub> (TTFTC)(H <sub>2</sub> O) <sub>3</sub> ]·H <sub>2</sub> O                                                      | 1.332 | 1.762 | 1.757 | 1.336 | 0.851    | 0      | [5]  |
| 1-[Cs <sub>4</sub> (TTFTC)(H <sub>2</sub> O) <sub>2</sub> ]                                                                     | 1.317 | 1.764 | 1.756 | 1.368 | 0.834    | 0      | [5]  |
| 2-[Cs <sub>4</sub> (TTFTC)(H <sub>2</sub> O) <sub>2</sub> ]                                                                     | 1.317 | 1.770 | 1.758 | 1.340 | 0.870    | 0      | [5]  |

\*Mean distances value are reported for each TTF-five-member ring, labels 1 and 2 correspond to different ring for non-centrosymmetric TTF.

| <b>Table S5.</b> contacts S $\cdots$ S distances < 3,90 Å (in bold < 3,60 Å) |                 |                |          |                                                 |          |
|------------------------------------------------------------------------------|-----------------|----------------|----------|-------------------------------------------------|----------|
| interlayer                                                                   |                 | intralayer     |          |                                                 |          |
| 1                                                                            |                 | 2              |          | 3                                               |          |
| S1 $\cdots$ S4 <sup>(IV)</sup>                                               | 3.702(2)        | S1 $\cdots$ S5 | 3.858(2) | <b>S5<math>\cdots</math>S10<sup>(I)</sup></b>   | 3.493(2) |
| <b>S2<math>\cdots</math>S3<sup>(IV)</sup></b>                                | <b>3.559(2)</b> | S2 $\cdots$ S6 | 3.654(2) | <b>S6<math>\cdots</math>S9<sup>(I)</sup></b>    | 3.516(2) |
| S3 $\cdots$ S4 <sup>(IV)</sup>                                               | 3.884(2)        | S3 $\cdots$ S7 | 3.834(2) | <b>S7<math>\cdots</math>S9<sup>(III)</sup></b>  | 3.594(2) |
|                                                                              |                 | S4 $\cdots$ S8 | 3.763(2) | <b>S8<math>\cdots</math>S10<sup>(III)</sup></b> | 3.506(2) |
|                                                                              |                 | S4 $\cdots$ S6 | 3.814(2) | S8 $\cdots$ S9 <sup>(III)</sup>                 | 3.802(2) |

Symmetry codes:  
(I) 2-x,1-y,1-z; (II) x, y,1+z; (III) 2-x,1-y,1-z; (IV) 1-x,-y,1-z

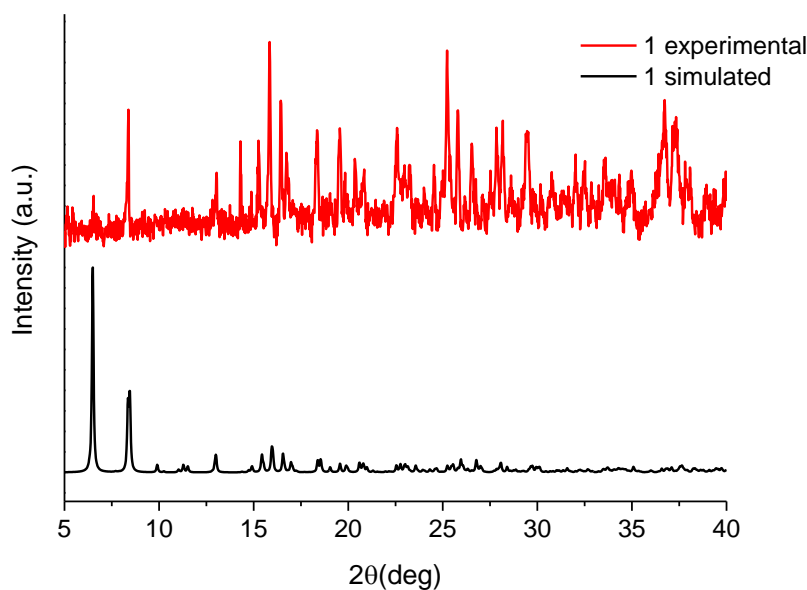

**Figure S3.** experimental (top, red) and calculated (bottom, black) PXRD pattern for 1-Dy.

### Photophysical characterization

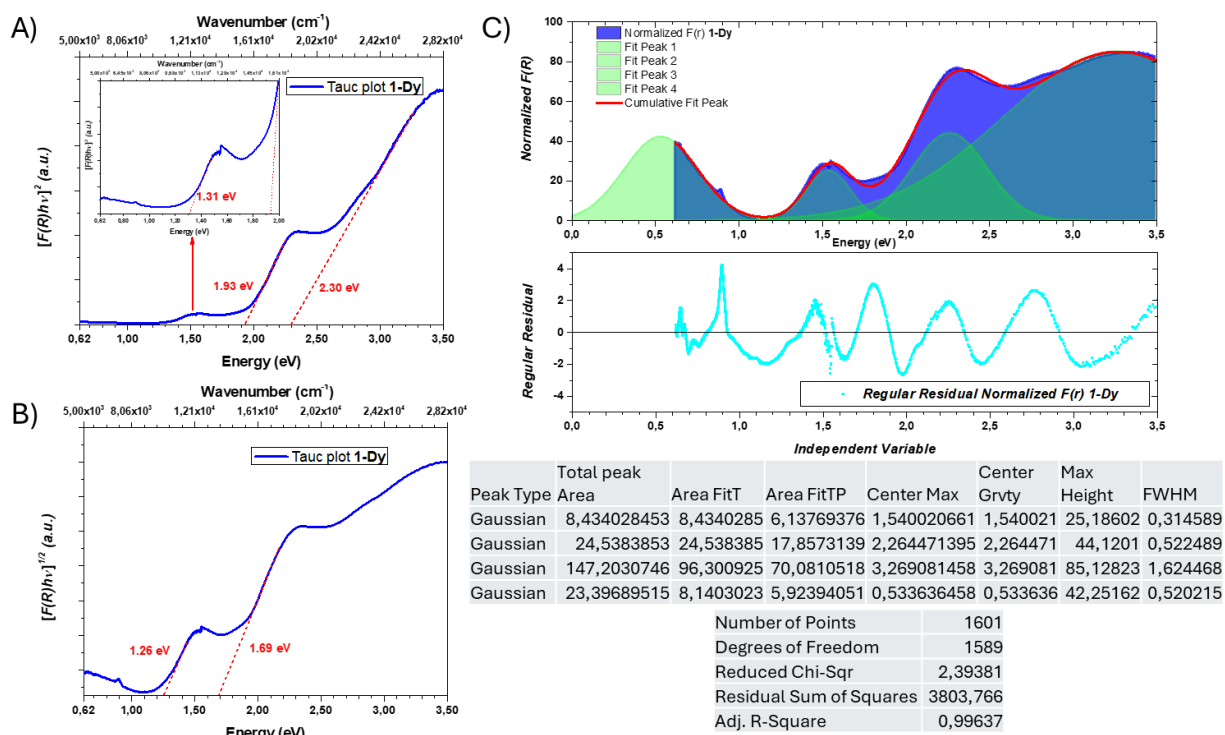

**Figure S4.** a) Direct and b) indirect band gaps optical determination trough Tauc plot. c) Gaussian fit with regular residual graphic and gaussian fit parameters calculated by Origin9.

## Electron transport properties of TTF-MOFs

| <b>Table S6.</b> Selected example for conductive TTF-MOFs.                                                                                                                                  |                        |         |                |      |
|---------------------------------------------------------------------------------------------------------------------------------------------------------------------------------------------|------------------------|---------|----------------|------|
| Compound                                                                                                                                                                                    | $\sigma_{rt}$ (S/cm)   | Ea (eV) | Method         | Ref. |
| Cd <sub>2</sub> (TTFTB)                                                                                                                                                                     | $2.86 \times 10^{-4}$  | 0.293   | 2-probe SC     | [6]  |
| Zn <sub>2</sub> (TTFTB)                                                                                                                                                                     | $3.95 \times 10^{-6}$  |         | 2-probe SC     | [6]  |
| Mn <sub>2</sub> (TTFTB)                                                                                                                                                                     | $8.64 \times 10^{-5}$  |         | 2-probe SC     | [6]  |
| Co <sub>2</sub> (TTFTB)                                                                                                                                                                     | $1.49 \times 10^{-5}$  |         | 2-probe SC     | [6]  |
| La <sub>4</sub> (TTFTB) <sub>4</sub>                                                                                                                                                        | $2.5 \times 10^{-6}$   | 0.28    | 2-probe pellet | [7]  |
| La(TTFTB)                                                                                                                                                                                   | $9.0 \times 10^{-7}$   | 0.20    | 2-probe pellet | [7]  |
| La <sub>4</sub> (TTFTB) <sub>3</sub>                                                                                                                                                        | $1.0 \times 10^{-9}$   | 0.40    | 2-probe pellet | [7]  |
| Dy(TTFTB)                                                                                                                                                                                   | $3 \times 10^{-7}$     |         | 4-probe pellet | [8]  |
| Gd <sub>3</sub> (TTFTB) <sub>2</sub> (OAc)(OH)                                                                                                                                              | $2.0 \times 10^{-7}$   |         | 4-probe pellet | [8]  |
| Tb <sub>3</sub> (TTFTB) <sub>2</sub> (OAc)(OH)                                                                                                                                              | $1.5 \times 10^{-6}$   |         | 4-probe pellet | [8]  |
| Dy <sub>3</sub> (TTFTB) <sub>2</sub> (OAc)(OH)                                                                                                                                              | $3.9 \times 10^{-7}$   |         | 4-probe pellet | [8]  |
| Ho <sub>3</sub> (TTFTB) <sub>2</sub> (OAc)(OH)                                                                                                                                              | $6.7 \times 10^{-6}$   |         | 4-probe pellet | [8]  |
| Er <sub>3</sub> (TTFTB) <sub>2</sub> (OAc)(OH)                                                                                                                                              | $7.4 \times 10^{-6}$   |         | 4-probe pellet | [8]  |
| Er <sub>4</sub> (TTFTB) <sub>3</sub> (I <sub>3</sub> ) <sub>2</sub>                                                                                                                         | $2 \times 10^{-8}$     |         | 2-probe pellet | [9]  |
| Er <sub>4</sub> (TTFTB) <sub>3</sub>                                                                                                                                                        | $1 \times 10^{-9}$     |         | 2-probe pellet | [9]  |
| Tb <sub>4</sub> (TTFTB) <sub>3</sub> (I <sub>3</sub> ) <sub>2</sub>                                                                                                                         | $4 \times 10^{-8}$     |         | 2-probe pellet | [9]  |
| Tb <sub>4</sub> (TTFTB) <sub>3</sub>                                                                                                                                                        | $1 \times 10^{-8}$     |         | 2-probe pellet | [9]  |
| Dy <sub>4</sub> (TTFTB) <sub>3</sub> (I <sub>3</sub> ) <sub>2</sub>                                                                                                                         | $1 \times 10^{-8}$     |         | 2-probe pellet | [9]  |
| Dy <sub>4</sub> (TTFTB) <sub>3</sub>                                                                                                                                                        | $7 \times 10^{-9}$     |         | 2-probe pellet | [9]  |
| Ho <sub>4</sub> (TTFTB) <sub>3</sub> (I <sub>3</sub> ) <sub>2</sub>                                                                                                                         | $8 \times 10^{-9}$     |         | 2-probe pellet | [9]  |
| Ho <sub>4</sub> (TTFTB) <sub>3</sub>                                                                                                                                                        | $1 \times 10^{-9}$     |         | 2-probe pellet | [9]  |
| Yb <sub>6</sub> (TTFTB) <sub>5</sub>                                                                                                                                                        | $9 \times 10^{-7}$     |         | 2-probe pellet | [10] |
| Lu <sub>6</sub> (TTFTB) <sub>5</sub>                                                                                                                                                        | $3 \times 10^{-7}$     |         | 2-probe pellet | [10] |
| {[Gd <sub>4</sub> (TTF-DC) <sub>6</sub> (DMF) <sub>4</sub> (H <sub>2</sub> O) <sub>2</sub> ]·4DMF} <sub>n</sub>                                                                             | $2.13 \times 10^{-10}$ |         | 2-probe pellet | [11] |
| {[Tb <sub>4</sub> (TTF-DC) <sub>6</sub> (DMF) <sub>4</sub> (H <sub>2</sub> O) <sub>2</sub> ]·4DMF} <sub>n</sub>                                                                             | $1.54 \times 10^{-10}$ |         | 2-probe pellet | [11] |
| {[Dy <sub>4</sub> (TTF-DC) <sub>6</sub> (DMF) <sub>4</sub> (H <sub>2</sub> O) <sub>2</sub> ]·4DMF} <sub>n</sub>                                                                             | $1.24 \times 10^{-10}$ |         | 2-probe pellet | [11] |
| {[Er <sub>4</sub> (TTF-DC) <sub>6</sub> (DMF) <sub>4</sub> (H <sub>2</sub> O) <sub>2</sub> ]·4DMF} <sub>n</sub>                                                                             | $6.63 \times 10^{-9}$  |         | 2-probe pellet | [11] |
| {[Gd <sub>4</sub> (TTF-DC) <sub>4</sub> (DMF) <sub>4</sub> (H <sub>2</sub> O) <sub>2</sub> (TTF <sup>++</sup> -DC) <sub>2</sub> ](I <sub>3</sub> <sup>-</sup> ) <sub>2</sub> ] <sub>n</sub> | $2.96 \times 10^{-7}$  |         | 2-probe pellet | [11] |
| {[Er <sub>4</sub> (TTF-DC) <sub>4</sub> (DMF) <sub>4</sub> (H <sub>2</sub> O) <sub>2</sub> (TTF <sup>++</sup> -DC) <sub>2</sub> ](I <sub>3</sub> <sup>-</sup> ) <sub>2</sub> ] <sub>n</sub> | $9.88 \times 10^{-7}$  |         | 2-probe pellet | [11] |



|                                                                                                                                                              |                        |      |                |      |
|--------------------------------------------------------------------------------------------------------------------------------------------------------------|------------------------|------|----------------|------|
| $\{[\text{Tb}_4(\text{TTF-DC})_4(\text{DMF})_4(\text{H}_2\text{O})_2(\text{TTF}^{++}-\text{DC})_2](\text{I}_3^-)_2\}_n$                                      | $1.28 \times 10^{-6}$  |      | 2-probe pellet | [11] |
| $\{[\text{Dy}_4(\text{TTF-DC})_4(\text{DMF})_4(\text{H}_2\text{O})_2(\text{TTF}^{++}-\text{DC})_2](\text{I}_3^-)_2\}_n$                                      | $2.19 \times 10^{-6}$  |      | 2-probe pellet | [11] |
| $([\text{Na}_4(\text{TTFTC})(\text{H}_2\text{O})_2] \cdot 0.5\text{H}_2\text{O})$                                                                            | $3.4 \times 10^{-5}$   | 0.06 | 2-probe pellet | [5]  |
| $([\text{K}_4(\text{TTFTC})(\text{H}_2\text{O})_2] \cdot 2\text{H}_2\text{O})$                                                                               | $1.7 \times 10^{-5}$   | 0.18 | 2-probe pellet | [5]  |
| $([\text{K}_4(\text{TTFTC})(\text{H}_2\text{O})_2] \cdot 2\text{H}_2\text{O})(\text{ox})$                                                                    | $6.3 \times 10^{-5}$   | 0.16 | 2-probe pellet | [5]  |
| $([\text{Rb}_4(\text{TTFTC})(\text{H}_2\text{O})_3] \cdot \text{H}_2\text{O})$                                                                               | $1.5 \times 10^{-5}$   | 0.19 | 2-probe pellet | [5]  |
| $([\text{Rb}_4(\text{TTFTC})(\text{H}_2\text{O})_3] \cdot \text{H}_2\text{O})(\text{ox})$                                                                    | $4.1 \times 10^{-5}$   | 0.19 | 2-probe pellet | [5]  |
| $([\text{Cs}_4(\text{TTFTC})(\text{H}_2\text{O})_2])$                                                                                                        | $1.3 \times 10^{-7}$   |      | 2-probe pellet | [5]  |
| $([\text{Tb}_6(\text{mTTFTB})2.5(\mu_3\text{-OH})8(\text{H}_2\text{O})_2(\text{HCOO})_2])$                                                                   | $1.8 \times 10^{-8}$   |      | 2-probe pellet | [12] |
| $([\text{Dy}_6(\text{mTTFTB})2.5(\mu_3\text{-OH})8(\text{H}_2\text{O})_2(\text{HCOO})_2])$                                                                   | $3.0 \times 10^{-8}$   |      | 2-probe pellet | [12] |
| $([\text{Er}_6(\text{mTTFTB})2.5(\mu_3\text{-OH})8(\text{H}_2\text{O})_2(\text{HCOO})_2])$                                                                   | $7.1 \times 10^{-8}$   |      | 2-probe pellet | [12] |
| $([\text{CuCN})_2(\text{TTF}(\text{py})_4])$                                                                                                                 | $3.5 \times 10^{-10}$  |      | 2-probe pellet | [13] |
| $([\text{CuCN})_2(\text{TTF}(\text{py})_4) (\text{I}_2 \text{ ox})$                                                                                          | $2.3 \times 10^{-5}$   |      | 2-probe pellet | [13] |
| $[\text{Cu}(\text{H}_2\text{TTFTB})(\text{NH}_2\text{Me}_2)] \cdot 2\text{DMF} \cdot 4\text{H}_2\text{O}$                                                    | $1.12 \times 10^{-5}$  |      | Not specified  | [14] |
| $[\text{Cu}(\text{H}_2\text{O})(\text{H}_2\text{TTFTB})(\text{NH}_2\text{Me}_2)0.5] \cdot 2\text{C}_6\text{H}_{12}$                                          | $1.17 \times 10^{-5}$  |      | Not specified  | [14] |
| $\text{Mn}_4(\text{TTFTB})_4(\text{H}_2\text{O})7\text{DMF}$                                                                                                 | $3.17 \times 10^{-6}$  |      | 2-probe pellet | [15] |
| $\text{Co}_6(\text{TTFTB})_4(\text{H}_2\text{O})$                                                                                                            | $1.66 \times 10^{-7}$  |      | 2-probe pellet | [15] |
| $\text{Co}(\text{H}_2\text{TTFTB})(\text{H}_2\text{O})4\text{DMF}$                                                                                           | $8.97 \times 10^{-9}$  |      | 2-probe pellet | [15] |
| $(\text{UO}_2)_4(\text{TTFTB})_3(\text{DMA})_4(\text{H}_2\text{O})_6(\text{DMF})_8$                                                                          | $2.2 \times 10^{-7}$   |      | 4-probe pellet | [16] |
| $[\text{Zn}(\text{TTF}(\text{py})_4)(\text{TCNQ}^-)_{1/2}](\text{TCNQ}^-)_{1/2}(\text{NO}_3) \cdot 2\text{CH}_3\text{OH}$                                    | $2.48 \times 10^{-8}$  |      | 2-probe pellet | [17] |
| $[\text{Cd}(\text{TTF}(\text{py})_4)(\text{TCNQ}^-)_{1/2}](\text{TCNQ}^-)_{1/2}(\text{NO}_3) \cdot \text{CH}_2\text{Cl}_2$                                   | $2.63 \times 10^{-8}$  |      | 2-probe pellet | [17] |
| $[\text{Cd}(\text{TTF}(\text{py})_4)(\text{TCNQ}^-)_{1/2}](\text{I}_3)(\text{NO}_3)_{1/2} \cdot 1/2(\text{C}_6\text{H}_{12} \cdot \text{CH}_3\text{OH})$     | $2.16 \times 10^{-7}$  |      | 2-probe pellet | [17] |
| $[\text{Ni}(\text{py-TTF-py})(\text{BPDC})] \cdot 2\text{H}_2\text{O}$                                                                                       | $8.0 \times 10^{-11}$  |      | 2-probe pellet | [18] |
| $[\text{Zn}(\text{py-TTF-py})(\text{BPDC})] \cdot 2\text{H}_2\text{O}$                                                                                       | $4.1 \times 10^{-12}$  |      | 2-probe pellet | [18] |
| $[\text{Ni}(\text{py-TTF-py})(\text{BPDC})] \cdot 2\text{H}_2\text{O} (\text{I}_2 \text{ ox})$                                                               | $2.5 \times 10^{-5}$   |      | 2-probe pellet | [18] |
| $[\text{Zn}(\text{py-TTF-py})(\text{BPDC})] \cdot 2\text{H}_2\text{O} (\text{I}_2 \text{ ox})$                                                               | $1.9 \times 10^{-5}$   |      | 2-probe pellet | [18] |
| $[\text{Fe}(\text{dca})_2][\text{TTF}(\text{py})_4]0.5 \cdot 0.5\text{CH}_2\text{Cl}_2\}_n$                                                                  | $4.1 \times 10^{-9}$   |      | 2-probe pellet | [19] |
| $\{[\text{Fe}(\text{dca})][\text{TTF}(\text{py})_4] \cdot \text{ClO}_4 \cdot \text{CH}_2\text{Cl}_2 \cdot 2\text{CH}_3\text{OH}\}_n$                         | $1.2 \times 10^{-7}$   |      | 2-probe pellet | [19] |
| $[\text{Fe}(\text{dca})_2][\text{TTF}(\text{py})_4]_{0.5} \cdot 0.5\text{CH}_2\text{Cl}_2\}_n (\text{I}_2 \text{ ox})$                                       | $1.3 \times 10^{-6}$   |      | 2-probe pellet | [19] |
| $\{[\text{Fe}(\text{dca})][\text{TTF}(\text{py})_4] \cdot \text{ClO}_4 \cdot \text{CH}_2\text{Cl}_2 \cdot 2\text{CH}_3\text{OH}\}_n (\text{I}_2 \text{ ox})$ | $7.6 \times 10^{-5}$   |      | 2-probe pellet | [19] |
| $\text{Zn}_3(\text{ExTTFTB})_2(\text{H}_2\text{O})_4 \cdot 6\text{EtOH}$                                                                                     | $3.02 \times 10^{-10}$ |      | 2-probe pellet | [20] |

|                                                                                                  |                       |              |                         |                  |
|--------------------------------------------------------------------------------------------------|-----------------------|--------------|-------------------------|------------------|
| $\text{Zn}_3(\text{ExTTFTB})_2(\text{H}_2\text{O})_4 \cdot 6\text{EtOH} (\text{I}_2 \text{ ox})$ | $3.18 \times 10^{-6}$ |              | 2-probe pellet          | [20]             |
| $\text{Zn}_2(\text{DPTTF})(\text{TCPB}) \cdot 3\text{DMA}$                                       | $1 \times 10^{-8}$    |              | 2-probe pellet          | [21]             |
| $\text{Zn}_2(\text{DPTTF})(\text{TCPB}) \cdot 3\text{DMA} (\text{I}_2 \text{ ox})$               | $5 \times 10^{-7}$    |              | 2-probe pellet          | [21]             |
| $(\text{BVDT-TTF-Py}_4)(\text{CdCl}_2)$                                                          | $7-9 \times 10^{-10}$ |              | 2-probe SC              | [22]             |
| $(\text{BVDT-TTF-Py}_4)(\text{CdCl}_2)(\text{I}_3)$                                              | $4-6 \times 10^{-9}$  |              | 2-probe SC              | [22]             |
| $[\text{Dy}_6(\text{TTFTC})_5(\text{H}_2\text{O})_{22}] \cdot (\text{H}_2\text{O})_{21}$         | $1 \times 10^{-3}$    | <b>0.164</b> | 4-probe SC & 2-probe SC | <b>This work</b> |

## Magnetic Properties

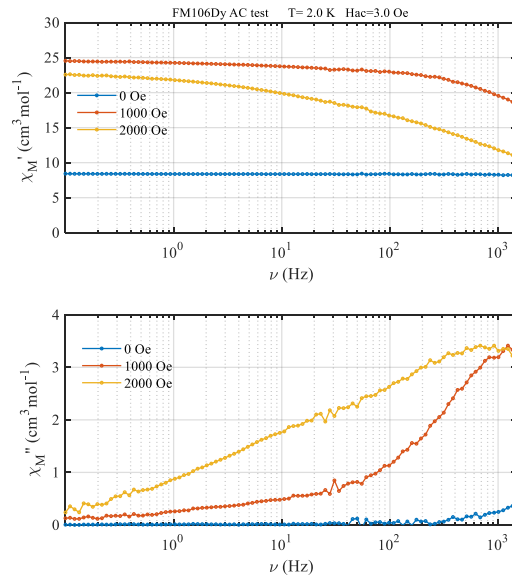

**Figure S5.** *ac* susceptibility of **1Dy** at 0.0, 1.0 and 2.0 kOe,

$$\chi'(\omega) = \chi_{S,tot} + \Delta\chi_1 \frac{1+(\omega\tau_1)^{1-\alpha_1} \sin\left(\frac{\pi\alpha_1}{2}\right)}{1+(\omega\tau_1)^{1-\alpha_1} \sin\left(\frac{\pi\alpha_1}{2}\right) + (\omega\tau_1)^{(2-2\alpha_1)}} + \Delta\chi_2 \frac{1+(\omega\tau_2)^{1-\alpha_2} \sin\left(\frac{\pi\alpha_2}{2}\right)}{1+(\omega\tau_2)^{1-\alpha_2} \sin\left(\frac{\pi\alpha_2}{2}\right) + (\omega\tau_2)^{(2-2\alpha_2)}} \quad (\text{eq-1})$$

$$\chi''(\omega) = \Delta\chi_1 \frac{1+(\omega\tau_1)^{1-\alpha_1} \cos\left(\frac{\pi\alpha_1}{2}\right)}{1+(\omega\tau_1)^{1-\alpha_1} \sin\left(\frac{\pi\alpha_1}{2}\right) + (\omega\tau_1)^{(2-2\alpha_1)}} + \Delta\chi_2 \frac{1+(\omega\tau_2)^{1-\alpha_2} \cos\left(\frac{\pi\alpha_2}{2}\right)}{1+(\omega\tau_2)^{1-\alpha_2} \sin\left(\frac{\pi\alpha_2}{2}\right) + (\omega\tau_2)^{(2-2\alpha_2)}} \quad (\text{eq-2})$$

Where  $\omega = 2\pi$

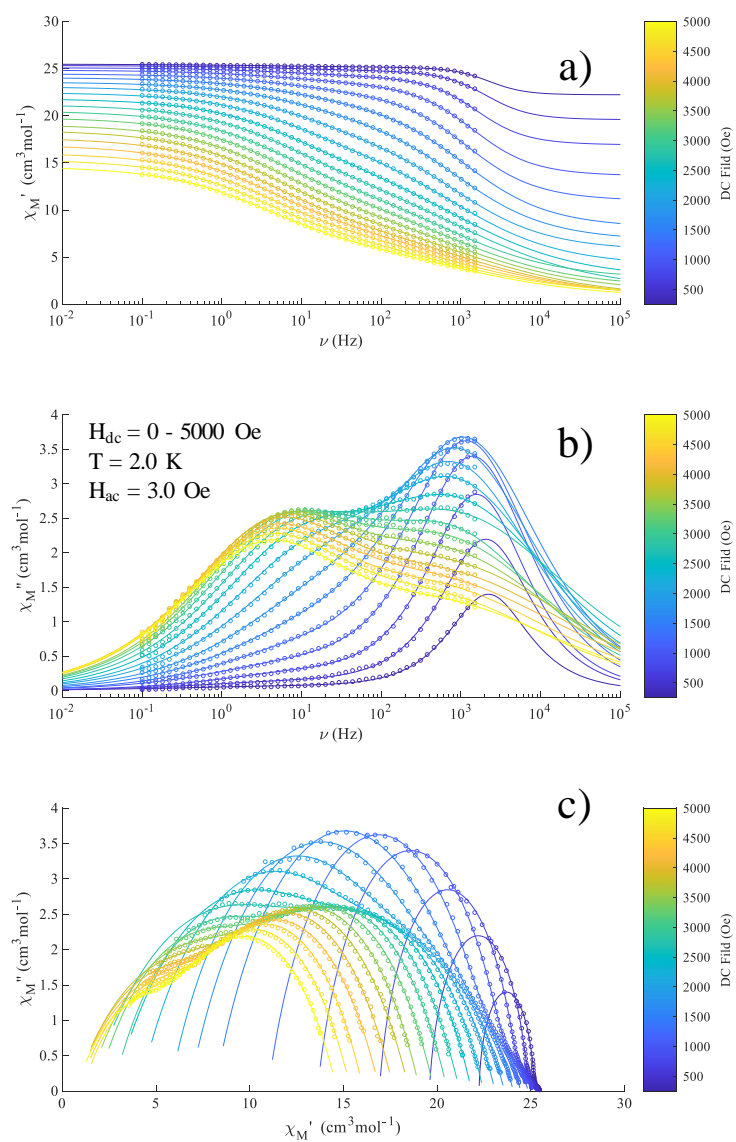

**Figure S6.** Field dependence of *ac* susceptibility a,b) ( $H_{ac}=3.0$  Oe) and Cole-Cole plots(c) for **1** at indicated temperature and field. The solid lines represented the best fits according the generalized Debye model for two relaxation processes. (eq. 1, 2) see also **Figure S8**).

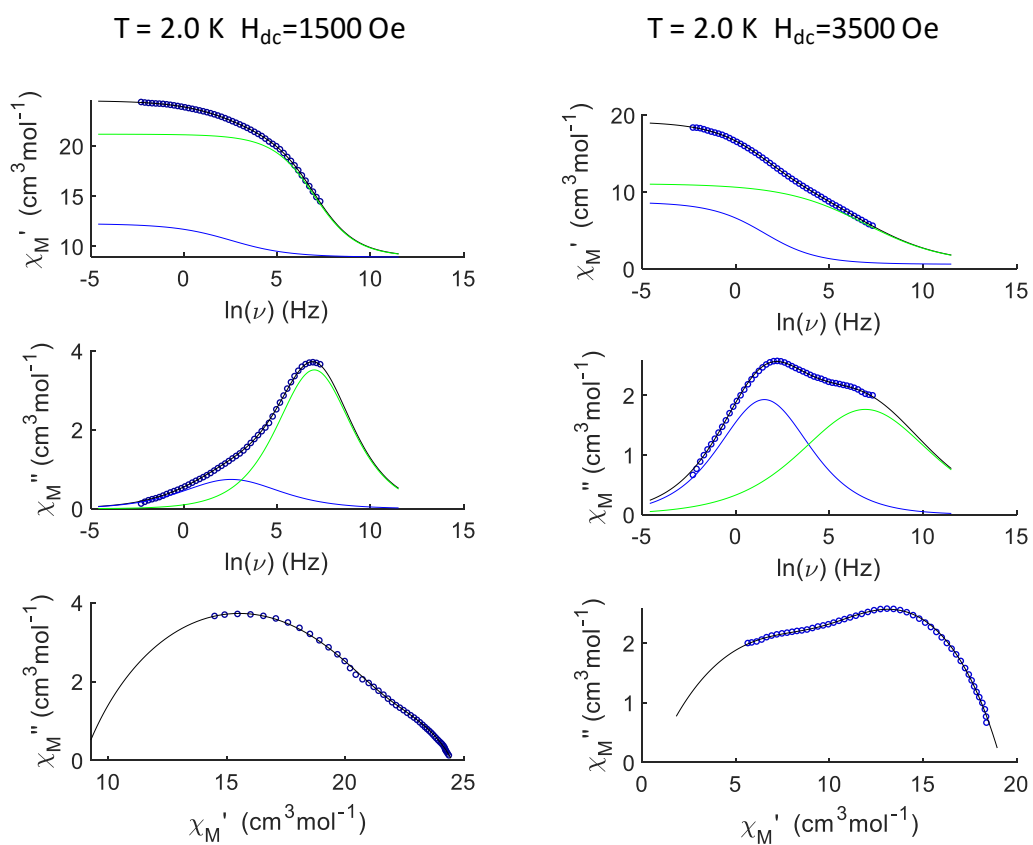

**Figure S7.** Example of AC susceptibility analysis for  $[\text{Dy}_6(\text{TTFTC})_5(\text{H}_2\text{O})_{22}] \cdot (\text{H}_2\text{O})_{21}$  (**1**) using the extended Debye model for two relaxation processes at  $H_{dc}=1500$  Oe (left) and  $H_{dc}=3500$  Oe (right). The contributions of the two relaxation processes are depicted in blue and green.

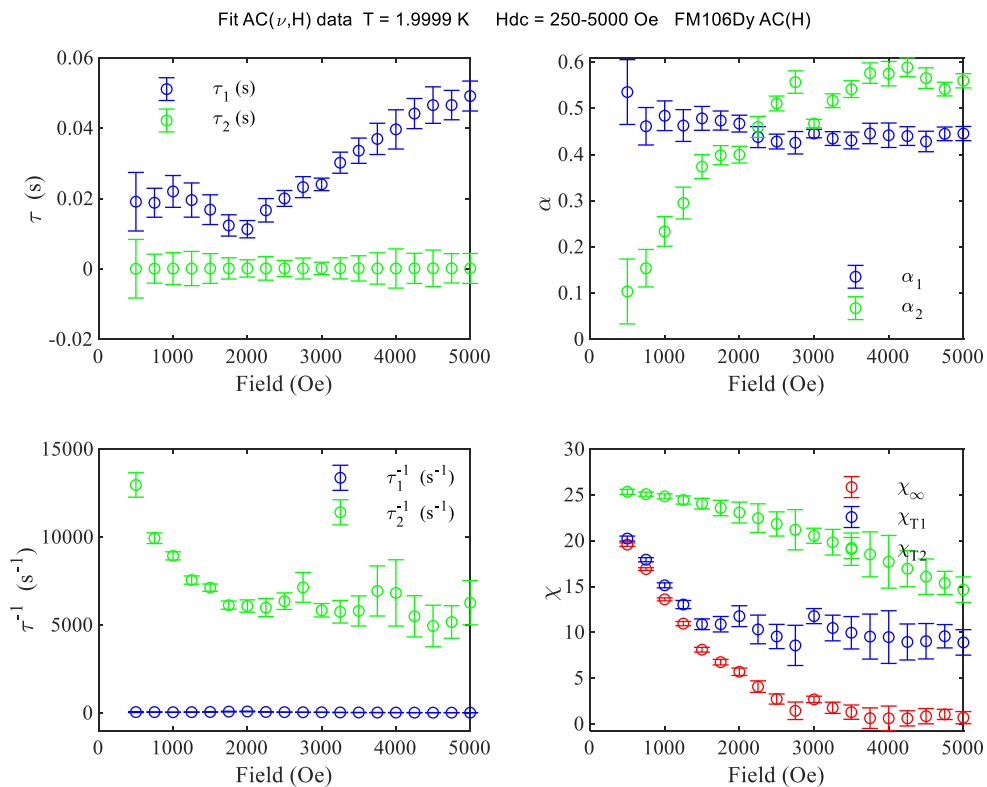

**Figure S8.** Graphical representation of variable parameters deduced from the best fits of the *ac* susceptibility of **1** collected with a 3.0 Oe *ac* field oscillating under different *dc* fields using the generalized Debye model for two relaxation processes. (See **Figure S6**).

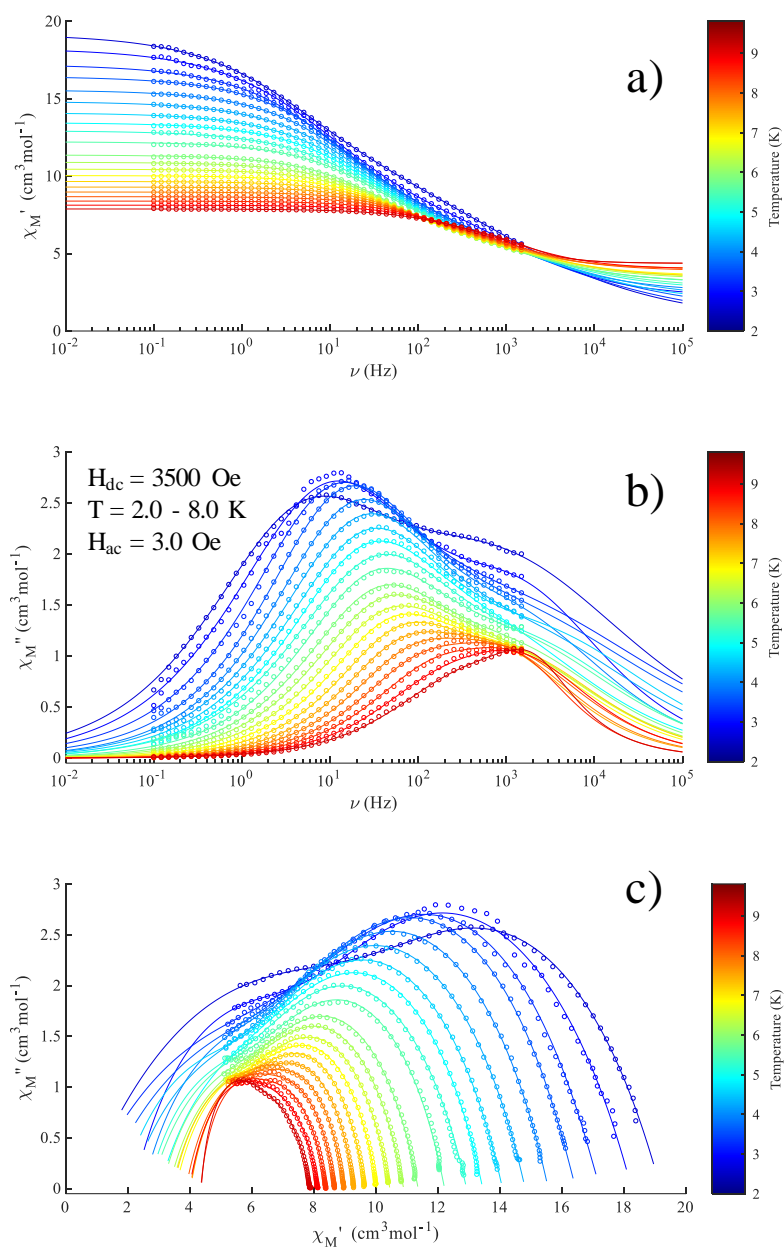

**Figure S9.** Temperature dependence of *ac* susceptibility a,b) ( $H_{ac}=3.0$  Oe) and Cole-Cole plots (c) for **1** at indicated temperature and field. The solid lines represented the best fits according to the generalized Debye model for two relaxation processes. (eq. 1, 2) see also **Figure S10**)

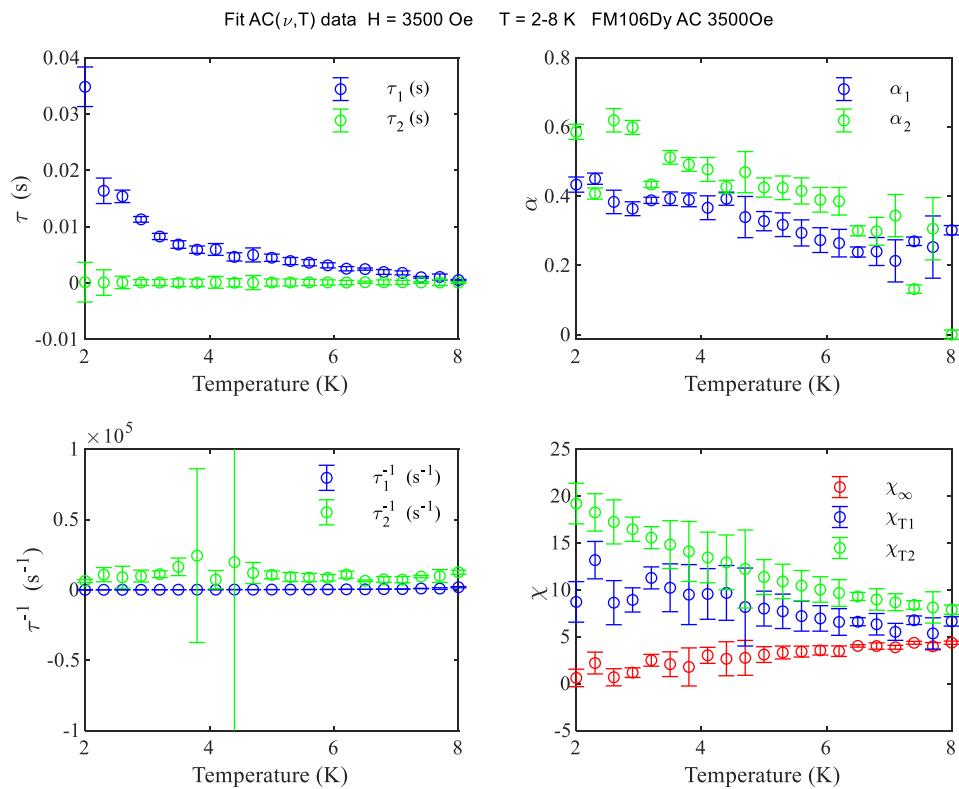

**Figure S10.** Graphical representation of variable parameters deduced from the best fits of the *ac* susceptibility of **1** collected under 1.5 kOe static field at different temperatures using the generalized Debye model for two relaxation processes. (See **Figure S9**).

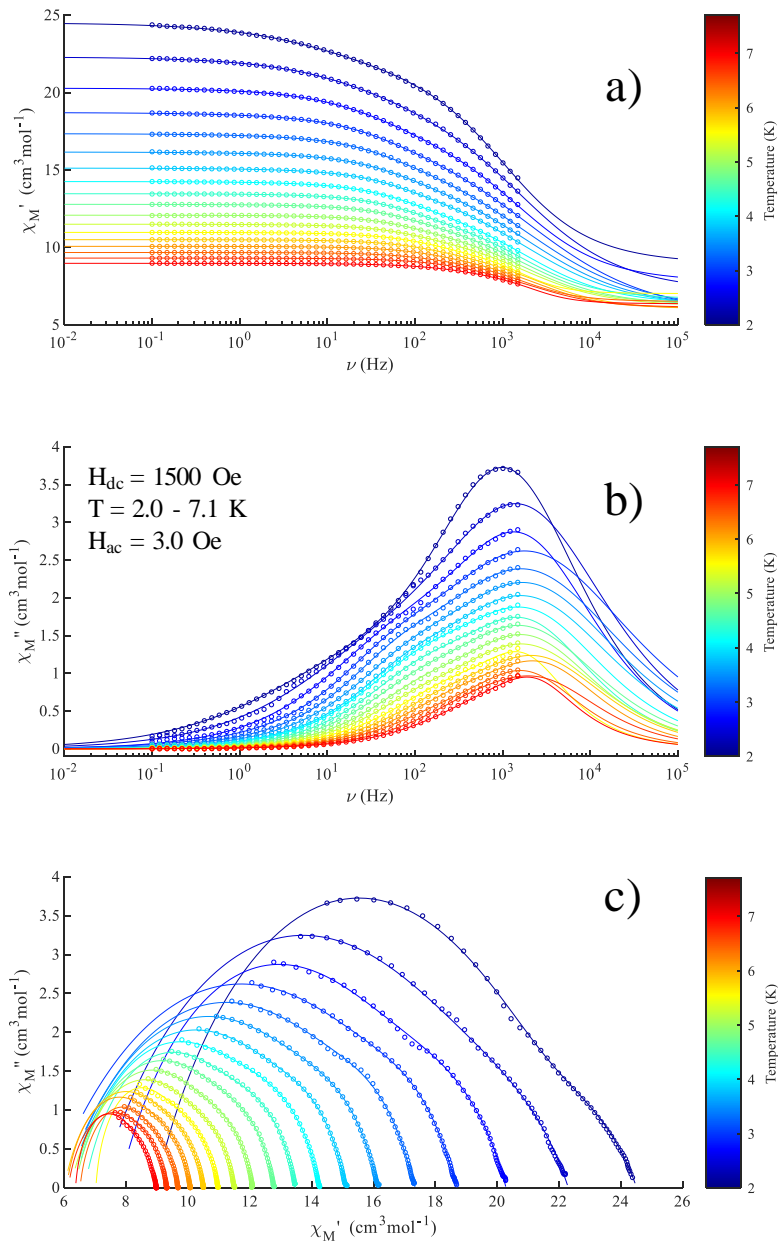

**Figure S11.** Temperature dependence of ac susceptibility a,b) ( $H_{ac}=3.0$  Oe) and Cole-Cole plots( c) for **1** at indicated temperature and field. The solid lines represented the best fits according the generalized Debye model for two relaxation processes. (eq. 1, 2) see also **Figure S12)**



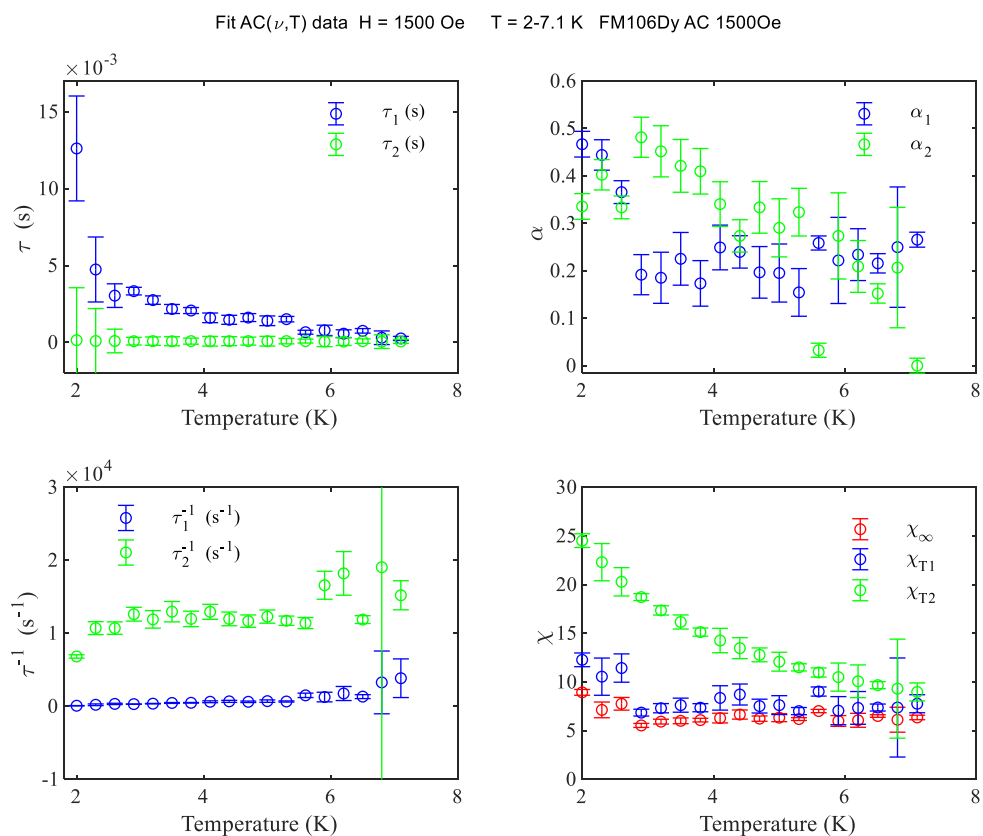

**Figure S12.** Graphical representation of variable parameters deduced from the best fits of the *ac* susceptibility of **1** collected under 1.5 kOe static field at different temperatures using the generalized Debye model for two relaxation processes. (See also **Figure S11**).

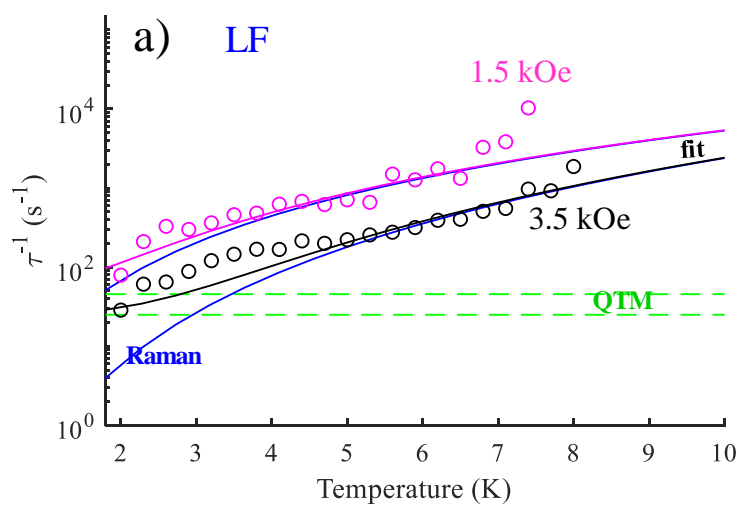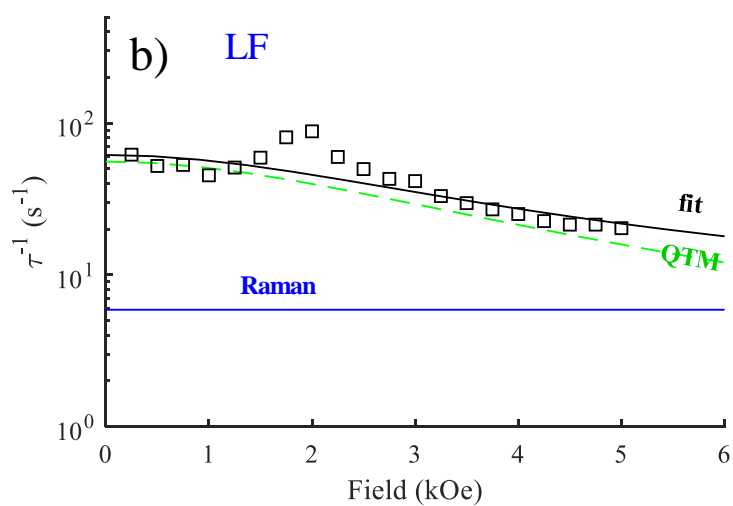

**Figure S13.** Temperature (a) and Field (b) dependence of relaxation time for Low Frequency process in **1**. The solid lines are the best fits with contribution of Raman and QTM.

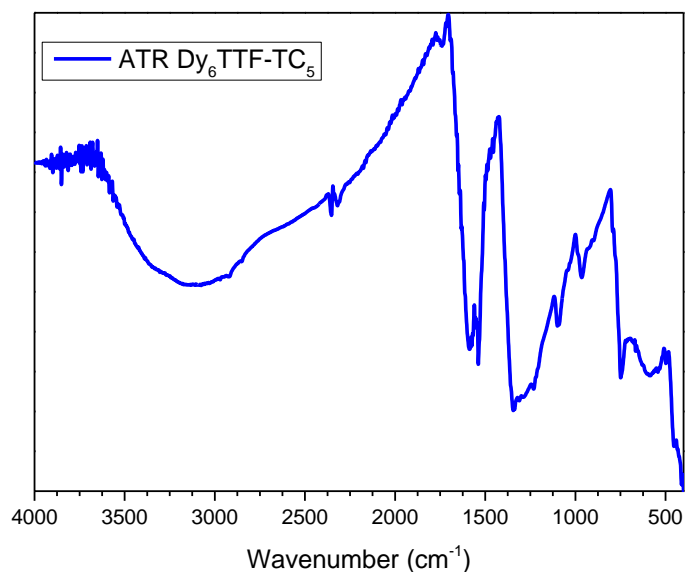

**Figure S14.** The ATR Spectrum of 1.

## References

- 1 T. L. A. Nguyen, R. Demir-Cakan, T. Devic, M. Morcrette, T. Ahnfeldt, P. Auban-Senzier, N. Stock, A. M. Goncalves, Y. Filinchuk, J. M. Tarascon and G. Férey, *Inorg. Chem.*, 2010, **49**, 7135–7143.
- 2 Y. Han and Y. Song, *Inorg. Chem. Commun.*, 2015, **55**, 83–87.
- 3 Y. F. Han, M. Li, T. W. Wang, Y. Z. Li, Z. Shen, Y. Song and X. Z. You, *Inorg. Chem. Commun.*, 2008, **11**, 945–947.
- 4 Y. De Huang, P. Huo, M. Y. Shao, J. X. Yin, W. C. Shen, Q. Y. Zhu and J. Dai, *Inorg. Chem.*, 2014, **53**, 3480–3487.
- 5 S. Zhang, D. K. Panda, A. Yadav, W. Zhou and S. Saha, *Chem. Sci.*, 2021, **12**, 13379–13391.
- 6 S. S. Park, E. R. Hontz, L. Sun, C. H. Hendon, A. Walsh, T. Van Voorhis and M. Dincă, *J. Am. Chem. Soc.*, 2015, **137**, 1774–1777.
- 7 L. S. Xie, E. V. Alexandrov, G. Skorupskii, D. M. Proserpio and M. Dincă, *Chem. Sci.*, 2019, **10**, 8558–8565.
- 8 J. Castells-Gil, S. Mañas-Valero, I. J. Vitórica-Yrezábal, D. Ananias, J. Rocha, R. Santiago, S. T. Bromley, J. J. Baldoví, E. Coronado, M. Souto and G. Mínguez Espallargas, *Chem. - A Eur. J.*, 2019, **25**, 12636–12643.
- 9 J. Su, T. H. Hu, R. Murase, H. Y. Wang, D. M. D'Alessandro, M. Kurmoo and J. L. Zuo, *Inorg. Chem.*, 2019, **58**, 6, 3698–3706.
- 10 L. S. Xie and M. Dincă, *Isr. J. Chem.*, 2018, **58**, 1119–1122.
- 11 J. J. Hu, Y. G. Li, H. R. Wen, S. J. Liu, Y. Peng and C. M. Liu, *Dalt. Trans.*, 2021, **50**, 14714–14723.
- 12 J. Su, N. Xu, R. Murase, Z. Yang, D. M. D'Alessandro, J. Zuo and J. Zhu, *Angew. Chem.*, 2021, **133**, 4839–4845.

- 13 Z. R. Zhang, Z. H. Ren, C. Y. Luo, L. J. Ma, J. Dai and Q. Y. Zhu, *Inorg. Chem.*, 2023, **62**, 4672–4679.
- 14 J. Su, S. Yuan, Y. X. Cheng, Z. M. Yang and J. L. Zuo, *Chem. Sci.*, 2021, **12**, 14254–14259.
- 15 J. Liu, D. H. Zhang, B. Wang, Z. A. Nan, X. L. Cao, G. L. Li, W. Wang, Z. Zhuo, Z. X. Lu and Y. G. Huang, *J. Mol. Struct.*, 2023, **1292**, 136119.
- 16 F. Zhai, H. Li, D. Gui, C. Xia, Z. Chai and S. Wang, *Dalt. Trans.*, 2022, **12**, 16448–16452.
- 17 H. Y. Wang, J. Su, J. P. Ma, F. Yu, C. F. Leong, D. M. D’Alessandro, M. Kurmoo and J. L. Zuo, *Inorg. Chem.*, 2019, **58**, 8657–8664.
- 18 Z. H. Ren, Z. R. Zhang, L. J. Ma, C. Y. Luo, J. Dai and Q. Y. Zhu, *ACS Appl. Mater. Interfaces*, 2023, **15**, 6621–6630.
- 19 H. Y. Wang, J. Y. Ge, C. Hua, C. Q. Jiao, Y. Wu, C. F. Leong, D. M. D’Alessandro, T. Liu and J. L. Zuo, *Angew. Chemie - Int. Ed.*, 2017, **56**, 5465–5470.
- 20 M. A. Gordillo, P. A. Benavides, D. K. Panda and S. Saha, *ACS Appl. Mater. Interfaces*, 2020, **12**, 12955–12961.
- 21 M. A. Gordillo, P. A. Benavides, K. Spalding and S. Saha, *Front. Chem.*, 2021, **9**, 1–6.
- 22 F. Solano, P. Auban-Senzier, I. Olejniczak, B. Barszcz, T. Runka, P. Alemany, E. Canadell, N. Avarvari and N. Zigon, *Chem. - Eur. J.*, 2023, **29**, e202203138.
